# Supplementary material for: Vaginal microbiome Lactobacillus crispatus is heritable among European American women
Source: PubMed Central journal article supplement (PMC8342574; doi:10.1038/s42003-021-02394-6), 2021-08-05
Supplement: 42003_2021_2394_MOESM2_ESM.pdf [file 42003_2021_2394_MOESM2_ESM.pdf]

1 **Supplementary Information**

2

3 **Supplemental Table 1.** Heritability estimates for predominant taxa by self-reported ancestry in women below  
 4 the average age of menopause onset (< 51 years old).

5

| Taxa                           | Ancestry | Component | Standardized Estimate | Unstandardized Estimate | 95% LI  | 95% UI |
|--------------------------------|----------|-----------|-----------------------|-------------------------|---------|--------|
| <i>Lactobacillus crispatus</i> | African  | A         | 0.2707                | 0.0794                  | -0.0635 | 0.2483 |
|                                |          | E         | 0.7293                | 0.2141                  | 0.1161  | 0.4130 |
|                                | European | A         | 0.3731                | 0.1602                  | 0.0596  | 0.2813 |
|                                |          | E         | 0.6269                | 0.2691                  | 0.1943  | 0.3819 |
| <i>Lactobacillus iners</i>     | African  | A         | 0.1527                | 0.0454                  | -0.0993 | 0.2108 |
|                                |          | E         | 0.8473                | 0.2516                  | 0.1393  | 0.4697 |
|                                | European | A         | 0.0798                | 0.0205                  | -0.0385 | 0.0824 |
|                                |          | E         | 0.9202                | 0.2369                  | 0.1762  | 0.3258 |
| <i>Gardnerella vaginalis</i>   | African  | A         | 0.1073                | 0.0094                  | -0.0323 | 0.0550 |
|                                |          | E         | 0.8927                | 0.0780                  | 0.0445  | 0.1428 |
|                                | European | A         | -0.1730               | -0.0169                 | -0.0432 | 0.0076 |
|                                |          | E         | 1.1730                | 0.1143                  | 0.0842  | 0.1580 |

LI = Lower Interval; UI = Upper Interval; A = additive genetic component; E = unique environmental component

6

7

8

9

10

11

12

13

14

15

16

17 **Supplemental Table 2a.** Model fit statistics for *L. crispatus* in the European American sample.

| Model | Comparison | Parameters | -2*Log Likelihood | DF  | AIC     | Log Likelihood Difference | DF Difference | P-value |
|-------|------------|------------|-------------------|-----|---------|---------------------------|---------------|---------|
| ACE   | -          | 4          | 461.544           | 240 | -18.456 | NA                        | NA            | NA      |
| AE    | ACE        | 3          | 463.562           | 241 | -18.438 | 2.018                     | 1             | 0.155   |
| CE    | ACE        | 3          | 467.132           | 241 | -14.868 | 5.588                     | 1             | 0.018   |
| E     | ACE        | 2          | 474.536           | 242 | -9.464  | 12.992                    | 2             | 0.002   |

18  
19

20 **Supplemental Table 2b.** Model fit statistics for *L. iners* in the European American sample.

| Model | Comparison | Parameters | -2*Log Likelihood | DF  | AIC      | Log Likelihood Difference | DF Difference | P-value |
|-------|------------|------------|-------------------|-----|----------|---------------------------|---------------|---------|
| ACE   | -          | 4          | 353.389           | 240 | -126.611 | NA                        | NA            | NA      |
| AE    | ACE        | 3          | 354.365           | 241 | -127.635 | 0.976                     | 1             | 0.323   |
| CE    | ACE        | 3          | 354.738           | 241 | -127.262 | 1.349                     | 1             | 0.245   |
| E     | ACE        | 2          | 355.125           | 242 | -128.875 | 1.736                     | 2             | 0.420   |

21  
22

23 **Supplemental Table 2c.** Model fit statistics for *G. vaginalis* in the European American sample.

| Model | Comparison | Parameters | -2*Log Likelihood | DF  | AIC      | Log Likelihood Difference | DF Difference | P-value |
|-------|------------|------------|-------------------|-----|----------|---------------------------|---------------|---------|
| ACE   | -          | 4          | 131.799           | 240 | -348.201 | NA                        | NA            | NA      |
| AE    | ACE        | 3          | 132.421           | 241 | -349.579 | 0.622                     | 1             | 0.430   |
| CE    | ACE        | 3          | 131.889           | 241 | -350.111 | 0.090                     | 1             | 0.765   |
| E     | ACE        | 2          | 134.841           | 242 | -349.159 | 3.042                     | 2             | 0.219   |

24  
25  
26  
27  
28  
29  
30  
31

32 **Supplemental Table 2d.** Model fit statistics for *L. crispatus* in the African American sample.

| Model | Comparison | Parameters | -2*Log Likelihood | DF | AIC     | Log Likelihood Difference | DF Difference | P-value |
|-------|------------|------------|-------------------|----|---------|---------------------------|---------------|---------|
| ACE   | -          | 4          | 132.505           | 84 | -35.495 | NA                        | NA            | NA      |
| AE    | ACE        | 3          | 132.608           | 85 | -37.392 | 0.103                     | 1             | 0.748   |
| CE    | ACE        | 3          | 132.854           | 85 | -37.146 | 0.349                     | 1             | 0.555   |
| E     | ACE        | 2          | 133.369           | 86 | -38.631 | 0.864                     | 2             | 0.649   |

33  
34

35 **Supplemental Table 2e.** Model fit statistics for *L. iners* in the African American sample.

| Model | Comparison | Parameters | -2*Log Likelihood | DF | AIC     | Log Likelihood Difference | DF Difference | P-value |
|-------|------------|------------|-------------------|----|---------|---------------------------|---------------|---------|
| ACE   | -          | 4          | 145.090           | 84 | -22.910 | NA                        | NA            | NA      |
| AE    | ACE        | 3          | 145.103           | 85 | -24.897 | 0.013                     | 1             | 0.909   |
| CE    | ACE        | 3          | 145.141           | 85 | -24.859 | 0.051                     | 1             | 0.822   |
| E     | ACE        | 2          | 145.244           | 86 | -26.756 | 0.155                     | 2             | 0.926   |

36  
37

38 **Supplemental Table 2f.** Model fit statistics for *G. vaginalis* in the African American sample.

| Model | Comparison | Parameters | -2*Log Likelihood | DF | AIC      | Log Likelihood Difference | DF Difference | P-value |
|-------|------------|------------|-------------------|----|----------|---------------------------|---------------|---------|
| ACE   | -          | 4          | 38.507            | 84 | -129.493 | NA                        | NA            | NA      |
| AE    | ACE        | 3          | 39.442            | 85 | -130.558 | 0.935                     | 1             | 0.334   |
| CE    | ACE        | 3          | 39.778            | 85 | -130.222 | 1.271                     | 1             | 0.260   |
| E     | ACE        | 2          | 39.894            | 86 | -132.106 | 1.386                     | 2             | 0.500   |

39  
40  
41  
42  
43  
44  
45  
46

**Supplemental Table 3a.** Expanded list of taxa in European American MZ.

| Taxa                            | ICC    | 95% LI  | 95% UI | *Cell 11 | Cell 12 | Cell 21 | Cell 22 |
|---------------------------------|--------|---------|--------|----------|---------|---------|---------|
| Aerococcus.christensenii        | 0.0401 | -0.1405 | 0.2182 | 39       | 21      | 14      | 10      |
| Anaerococcus.OTU145             | 0.0327 | -0.1478 | 0.2111 | 48       | 9       | 21      | 6       |
| Anaerococcus.tetradius          | 0.0000 | -0.1796 | 0.1796 | 63       | 9       | 11      | 1       |
| Atopobium.vaginae               | 0.3185 | 0.1473  | 0.4712 | 22       | 22      | 18      | 22      |
| Bifidobacterium.breve_cluster   | 0.3262 | 0.1557  | 0.4778 | 57       | 15      | 8       | 4       |
| Clostridiales.BVAB2             | 0.0000 | -0.1796 | 0.1796 | 55       | 14      | 13      | 2       |
| Coriobacteriaceae.OTU27         | 0.0000 | -0.1796 | 0.1796 | 46       | 14      | 18      | 6       |
| Dialister.cluster51             | 0.0000 | -0.1796 | 0.1796 | 50       | 15      | 14      | 5       |
| Enterobacteriaceae.cluster31    | 0.0232 | -0.1570 | 0.2020 | 50       | 10      | 13      | 11      |
| Fingoldia.magna                 | 0.5713 | 0.4364  | 0.6810 | 21       | 20      | 18      | 25      |
| Gardnerella.vaginalis           | 0.0000 | -0.1796 | 0.1796 | 1        | 13      | 8       | 62      |
| Lactobacillus.crispatus_cluster | 0.3801 | 0.2152  | 0.5240 | 3        | 12      | 10      | 59      |
| Lactobacillus.gasseri_cluster   | 0.1638 | -0.0163 | 0.3336 | 22       | 17      | 20      | 25      |
| Lactobacillus.iners             | 0.1245 | -0.0564 | 0.2975 | 1        | 7       | 9       | 67      |
| Lactobacillus.jensenii          | 0.0000 | -0.1796 | 0.1796 | 22       | 25      | 13      | 24      |
| Megasphaera.cluster52           | 0.0000 | -0.1796 | 0.1796 | 45       | 17      | 12      | 10      |
| Mycoplasma.hominis              | 0.0172 | -0.1630 | 0.1962 | 54       | 14      | 9       | 7       |
| Parvimonas.OTU142               | 0.0000 | -0.1796 | 0.1796 | 55       | 12      | 13      | 4       |
| Peptoniphilus.indolicus         | 0.2794 | 0.1051  | 0.4371 | 39       | 16      | 15      | 14      |
| Prevotella.OTU48                | 0.1578 | -0.0224 | 0.3281 | 66       | 4       | 11      | 3       |
| Prevotella.amnii                | 0.0000 | -0.1796 | 0.1796 | 51       | 16      | 12      | 5       |
| Prevotella.bivia                | 0.0000 | -0.1796 | 0.1796 | 29       | 18      | 22      | 15      |
| Prevotella.cluster2             | 0.0000 | -0.1796 | 0.1796 | 17       | 15      | 20      | 32      |
| Prevotella.disiens              | 0.0938 | -0.0872 | 0.2689 | 50       | 13      | 16      | 5       |
| Sneathia.amnii                  | 0.0439 | -0.1368 | 0.2218 | 42       | 12      | 16      | 14      |
| Sneathia.sanguinegens           | 0.0000 | -0.1796 | 0.1796 | 58       | 12      | 8       | 6       |
| Staphylococcus.cluster47        | 0.0104 | -0.1696 | 0.1896 | 36       | 16      | 15      | 17      |
| Streptococcus.agalactiae        | 0.0041 | -0.1756 | 0.1836 | 56       | 9       | 15      | 4       |
| Streptococcus.anginosus         | 0.1194 | -0.0616 | 0.2927 | 42       | 14      | 17      | 11      |
| TM7.OTU.H1                      | 0.0000 | -0.1796 | 0.1796 | 59       | 9       | 12      | 4       |
| Ureaplasma.cluster23            | 0.1010 | -0.0800 | 0.2757 | 39       | 11      | 15      | 19      |
| X_Lachnospiraceae_.BVAB1        | 0.0000 | -0.1796 | 0.1796 | 23       | 22      | 18      | 21      |

\* Cell XX denotes presence/absence of taxa in 2x2 contingency table within twin pair  
1 = Absent; 2 = Present; Cell 11 = taxa absent in both members of a twin pair  
ICC = Intraclass Correlation; LI = Lower Interval; UI = Upper Interval

**Supplemental Table 3b.** Expanded list of taxa in European Amerrican DZ twins.

| Taxa                            | ICC    | 95% LI  | 95% UI | *Cell 11 | Cell 12 | Cell 21 | Cell 22 |
|---------------------------------|--------|---------|--------|----------|---------|---------|---------|
| Aerococcus.christensenii        | 0.0000 | -0.2673 | 0.2673 | 15       | 10      | 8       | 5       |
| Anaerococcus.OTU145             | 0.2025 | -0.0684 | 0.4457 | 23       | 6       | 6       | 3       |
| Anaerococcus.tetradius          | 0.0000 | -0.2673 | 0.2673 | 27       | 8       | 3       | 0       |
| Atopobium.vaginae               | 0.0000 | -0.2673 | 0.2673 | 12       | 6       | 8       | 12      |
| Bifidobacterium.breve_cluster   | 0.1026 | -0.1693 | 0.3600 | 30       | 3       | 4       | 1       |
| Clostridiales.BVAB2             | 0.0000 | -0.2673 | 0.2673 | 28       | 5       | 3       | 2       |
| Coriobacteriaceae.OTU27         | 0.0000 | -0.2673 | 0.2673 | 22       | 9       | 6       | 1       |
| Dialister.cluster51             | 0.0595 | -0.2112 | 0.3216 | 19       | 10      | 6       | 3       |
| Enterobacteriaceae.cluster31    | 0.0080 | -0.2598 | 0.2747 | 26       | 5       | 6       | 1       |
| Fingoldia.magna                 | 0.4875 | 0.2532  | 0.6678 | 7        | 7       | 12      | 12      |
| Gardnerella.vaginalis           | 0.0000 | -0.2673 | 0.2673 | 2        | 6       | 4       | 26      |
| Lactobacillus.crispatus_cluster | 0.0000 | -0.2673 | 0.2673 | 2        | 3       | 4       | 29      |
| Lactobacillus.gasseri_cluster   | 0.0000 | -0.2673 | 0.2673 | 10       | 7       | 11      | 10      |
| Lactobacillus.iners             | 0.0000 | -0.2673 | 0.2673 | 1        | 4       | 3       | 30      |
| Lactobacillus.jensenii          | 0.0870 | -0.1846 | 0.3462 | 8        | 8       | 8       | 14      |
| Megasphaera.cluster52           | 0.1120 | -0.1601 | 0.3682 | 20       | 8       | 5       | 5       |
| Mycoplasma.hominis              | 0.0000 | -0.2673 | 0.2673 | 23       | 6       | 8       | 1       |
| Parvimonas.OTU142               | 0.0000 | -0.2673 | 0.2673 | 22       | 8       | 6       | 2       |
| Peptoniphilus.indolicus         | 0.3929 | 0.1403  | 0.5974 | 14       | 8       | 12      | 4       |
| Prevotella.OTU48                | 0.0000 | -0.2673 | 0.2673 | 27       | 6       | 4       | 1       |
| Prevotella.amnii                | 0.0081 | -0.2597 | 0.2748 | 28       | 4       | 3       | 3       |
| Prevotella.bivia                | 0.0000 | -0.2673 | 0.2673 | 14       | 10      | 11      | 3       |
| Prevotella.cluster2             | 0.1689 | -0.1030 | 0.4173 | 13       | 4       | 6       | 15      |
| Prevotella.disiens              | 0.5215 | 0.2955  | 0.6923 | 29       | 4       | 3       | 2       |
| Sneathia.amnii                  | 0.0000 | -0.2673 | 0.2673 | 16       | 5       | 10      | 7       |
| Sneathia.sanguinegens           | 0.0752 | -0.1960 | 0.3357 | 28       | 6       | 1       | 3       |
| Staphylococcus.cluster47        | 0.4595 | 0.2192  | 0.6473 | 15       | 5       | 10      | 8       |
| Streptococcus.agalactiae        | 0.0000 | -0.2673 | 0.2673 | 25       | 8       | 4       | 1       |
| Streptococcus.anginosus         | 0.1691 | -0.1028 | 0.4175 | 18       | 8       | 7       | 5       |
| TM7.OTU.H1                      | 0.0000 | -0.2672 | 0.2673 | 26       | 6       | 4       | 2       |
| Ureaplasma.cluster23            | 0.0024 | -0.2650 | 0.2695 | 16       | 10      | 5       | 7       |
| X_Lachnospiraceae_.BVAB1        | 0.0495 | -0.2207 | 0.3126 | 14       | 12      | 5       | 7       |

\* Cell XX denotes presence/absence of taxa in 2x2 contingency table within twin pair  
1 = Absent; 2 = Present; Cell 11 = taxa absent in both members of a twin pair  
ICC = Intraclass Correlation; LI = Lower Interval; UI = Upper Interval

**Supplemental Table 3c.** Expanded list of taxa in African American MZ.

| Taxa                            | ICC    | 95% LI  | 95% UI | *Cell 11 | Cell 12 | Cell 21 | Cell 22 |
|---------------------------------|--------|---------|--------|----------|---------|---------|---------|
| Aerococcus.christensenii        | 0.5498 | 0.2616  | 0.7479 | 5        | 3       | 7       | 9       |
| Anaerococcus.OTU145             | 0.0179 | -0.3205 | 0.3523 | 13       | 5       | 3       | 3       |
| Anaerococcus.tetradius          | 0.1355 | -0.2106 | 0.4515 | 13       | 5       | 2       | 4       |
| Atopobium.vaginae               | 0.0936 | -0.2508 | 0.4170 | 2        | 7       | 6       | 9       |
| Bifidobacterium.breve_cluster   | 0.0000 | -0.3365 | 0.3365 | 13       | 3       | 7       | 1       |
| Clostridiales.BVAB2             | 0.0000 | -0.3365 | 0.3365 | 8        | 5       | 8       | 3       |
| Coriobacteriaceae.OTU27         | 0.2473 | -0.0973 | 0.5390 | 10       | 4       | 2       | 8       |
| Dialister.cluster51             | 0.0000 | -0.3365 | 0.3365 | 5        | 6       | 7       | 6       |
| Enterobacteriaceae.cluster31    | 0.0000 | -0.3365 | 0.3365 | 18       | 2       | 3       | 1       |
| Finegoldia.magna                | 0.1251 | -0.2207 | 0.4430 | 11       | 1       | 4       | 8       |
| Gardnerella.vaginalis           | 0.2250 | -0.1207 | 0.5220 | 0        | 2       | 0       | 22      |
| Lactobacillus.crispatus_cluster | 0.2045 | -0.1417 | 0.5062 | 3        | 1       | 7       | 13      |
| Lactobacillus.gasseri_cluster   | 0.0000 | -0.3365 | 0.3365 | 6        | 8       | 8       | 2       |
| Lactobacillus.iners             | 0.0946 | -0.2499 | 0.4178 | 0        | 1       | 1       | 22      |
| Lactobacillus.jensenii          | 0.6247 | 0.3649  | 0.7943 | 6        | 6       | 10      | 2       |
| Megasphaera.cluster52           | 0.0000 | -0.3365 | 0.3365 | 6        | 5       | 7       | 6       |
| Mycoplasma.hominis              | 0.0578 | -0.2842 | 0.3868 | 10       | 5       | 6       | 3       |
| Parvimonas.OTU142               | 0.0580 | -0.2841 | 0.3870 | 10       | 5       | 5       | 4       |
| Peptoniphilus.indolicus         | 0.1152 | -0.2303 | 0.4348 | 7        | 7       | 3       | 7       |
| Prevotella.OTU48                | 0.1318 | -0.2143 | 0.4484 | 17       | 1       | 4       | 2       |
| Prevotella.amnii                | 0.0000 | -0.3365 | 0.3365 | 9        | 5       | 5       | 5       |
| Prevotella.bivia                | 0.1193 | -0.2263 | 0.4382 | 4        | 6       | 9       | 5       |
| Prevotella.cluster2             | 0.0737 | -0.2695 | 0.4003 | 4        | 3       | 5       | 12      |
| Prevotella.disiens              | 0.0467 | -0.2944 | 0.3773 | 14       | 3       | 3       | 4       |
| Sneathia.amnii                  | 0.1222 | -0.2235 | 0.4406 | 7        | 5       | 5       | 7       |
| Sneathia.sanguinegens           | 0.0000 | -0.3365 | 0.3365 | 9        | 3       | 6       | 6       |
| Staphylococcus.cluster47        | 0.0000 | -0.3365 | 0.3365 | 7        | 2       | 11      | 4       |
| Streptococcus.agalactiae        | 0.0059 | -0.3313 | 0.3417 | 11       | 3       | 7       | 3       |
| Streptococcus.anginosus         | 0.1423 | -0.2040 | 0.4569 | 10       | 4       | 7       | 3       |
| TM7.OTU.H1                      | 0.0000 | -0.3365 | 0.3365 | 14       | 3       | 6       | 1       |
| Ureaplasma.cluster23            | 0.0000 | -0.3365 | 0.3365 | 3        | 4       | 6       | 11      |
| X_Lachnospiraceae_.BVAB1        | 0.0000 | -0.3365 | 0.3365 | 8        | 3       | 5       | 8       |

\* Cell XX denotes presence/absence of taxa in 2x2 contingency table within twin pair  
1 = Absent; 2 = Present; Cell 11 = taxa absent in both members of a twin pair  
ICC = Intraclass Correlation; LI = Lower Interval; UI = Upper Interval

**Supplemental Table 3d.** Expanded list of taxa in African American DZ twins.

| Taxa                            | ICC    | 95% LI  | 95% UI | *Cell 11 | Cell 12 | Cell 21 | Cell 22 |
|---------------------------------|--------|---------|--------|----------|---------|---------|---------|
| Aerococcus.christensenii        | 0.0000 | -0.3687 | 0.3687 | 5        | 4       | 6       | 5       |
| Anaerococcus.OTU145             | 0.0000 | -0.3687 | 0.3687 | 13       | 3       | 2       | 2       |
| Anaerococcus.tetradius          | 0.0000 | -0.3687 | 0.3687 | 9        | 3       | 6       | 2       |
| Atopobium.vaginae               | 0.5096 | 0.1735  | 0.7394 | 2        | 4       | 4       | 10      |
| Bifidobacterium.breve_cluster   | 0.0000 | -0.3687 | 0.3687 | 16       | 2       | 1       | 1       |
| Clostridiales.BVAB2             | 0.0000 | -0.3687 | 0.3687 | 8        | 5       | 4       | 3       |
| Coriobacteriaceae.OTU27         | 0.0000 | -0.3687 | 0.3687 | 7        | 7       | 3       | 3       |
| Dialister.cluster51             | 0.0000 | -0.3687 | 0.3687 | 4        | 7       | 6       | 3       |
| Enterobacteriaceae.cluster31    | 0.0935 | -0.2851 | 0.4468 | 13       | 2       | 3       | 2       |
| Finegoldia.magna                | 0.0000 | -0.3687 | 0.3687 | 6        | 6       | 5       | 3       |
| Gardnerella.vaginalis           | 0.0000 | -0.3687 | 0.3687 | 0        | 3       | 2       | 15      |
| Lactobacillus.crispatus_cluster | 0.0622 | -0.3137 | 0.4213 | 3        | 2       | 5       | 10      |
| Lactobacillus.gasseri_cluster   | 0.0000 | -0.3687 | 0.3687 | 6        | 5       | 2       | 7       |
| Lactobacillus.iners             | 0.0304 | -0.3422 | 0.3947 | 0        | 0       | 0       | 20      |
| Lactobacillus.jensenii          | 0.0000 | -0.3687 | 0.3687 | 7        | 1       | 5       | 7       |
| Megasphaera.cluster52           | 0.0000 | -0.3687 | 0.3687 | 5        | 7       | 4       | 4       |
| Mycoplasma.hominis              | 0.0306 | -0.3420 | 0.3949 | 12       | 4       | 2       | 2       |
| Parvimonas.OTU142               | 0.0000 | -0.3687 | 0.3687 | 8        | 6       | 4       | 2       |
| Peptoniphilus.indolicus         | 0.0243 | -0.3476 | 0.3895 | 8        | 6       | 5       | 1       |
| Prevotella.OTU48                | 0.0000 | -0.3687 | 0.3687 | 12       | 3       | 4       | 1       |
| Prevotella.amnii                | 0.0000 | -0.3687 | 0.3687 | 11       | 4       | 4       | 1       |
| Prevotella.bivia                | 0.1428 | -0.2385 | 0.4860 | 5        | 4       | 6       | 5       |
| Prevotella.cluster2             | 0.0000 | -0.3687 | 0.3687 | 4        | 5       | 3       | 8       |
| Prevotella.disiens              | 0.0000 | -0.3687 | 0.3687 | 14       | 3       | 2       | 1       |
| Sneathia.amnii                  | 0.0000 | -0.3687 | 0.3687 | 6        | 9       | 2       | 3       |
| Sneathia.sanguinegens           | 0.0000 | -0.3687 | 0.3687 | 6        | 6       | 5       | 3       |
| Staphylococcus.cluster47        | 0.0000 | -0.3687 | 0.3687 | 8        | 5       | 3       | 4       |
| Streptococcus.agalactiae        | 0.0288 | -0.3436 | 0.3934 | 13       | 2       | 3       | 2       |
| Streptococcus.anginosus         | 0.0000 | -0.3687 | 0.3687 | 12       | 5       | 3       | 0       |
| TM7.OTU.H1                      | 0.0000 | -0.3687 | 0.3687 | 13       | 4       | 2       | 1       |
| Ureaplasma.cluster23            | 0.0000 | -0.3687 | 0.3688 | 8        | 1       | 5       | 6       |
| X_Lachnospiraceae_.BVAB1        | 0.1208 | -0.2595 | 0.4686 | 7        | 5       | 1       | 7       |

\* Cell XX denotes presence/absence of taxa in 2x2 contingency table within twin pair  
1 = Absent; 2 = Present; Cell 11 = taxa absent in both members of a twin pair  
ICC = Intraclass Correlation; LI = Lower Interval; UI = Upper Interval
